# Supplementary material for: Performance of joint modelling of time-to-event data with time-dependent predictors: an assessment based on transition to psychosis data
Source: PubMed Central journal article supplement (PMC5075698; doi:10.7717/peerj.2582), 2016-10-19
Supplement: peerj-04-2582-s004.pdf [file peerj-04-2582-s004.pdf]

Suppl emental \_real \_data. txt

```
"subj ", "famhist", "startday", "endday", "transtat", "dept"  
1, 0, 0, 32, 0, 30  
1, 0, 32, 60, 0, 11  
1, 0, 60, 88, 0, 16  
1, 0, 88, 119, 1, 24  
2, 0, 0, 39, 0, 22  
2, 0, 39, 88, 0, 24  
2, 0, 88, 144, 0, 12  
2, 0, 144, 186, 0, 8  
2, 0, 186, 237, 0, 10  
2, 0, 237, 270, 0, 12  
2, 0, 270, 300, 0, 10  
2, 0, 300, 347, 0, 13  
2, 0, 347, 400, 0, 16  
3, 1, 0, 35, 0, 5  
3, 1, 35, 98, 0, 2  
3, 1, 98, 169, 0, 4  
3, 1, 169, 210, 0, 2  
3, 1, 210, 231, 0, 2  
3, 1, 231, 317, 0, 10  
3, 1, 317, 350, 0, 1  
3, 1, 350, 380, 0, 8  
3, 1, 380, 408, 0, 9  
3, 1, 408, 408.5, 0, 4  
4, 1, 0, 53, 1, 23  
5, 0, 0, 99, 0, 16  
5, 0, 99, 666, 0, 22  
5, 0, 666, 707, 0, 26  
6, 1, 0, 56, 0, 8  
6, 1, 56, 91, 0, 4  
6, 1, 91, 126, 0, 3  
6, 1, 126, 159, 0, 2  
6, 1, 159, 197, 0, 3  
6, 1, 197, 216, 1, 20  
7, 1, 16, 65, 0, 9  
7, 1, 65, 94, 0, 10  
7, 1, 94, 122, 0, 9  
7, 1, 122, 166, 0, 11  
7, 1, 166, 199, 0, 12  
7, 1, 199, 234, 0, 9  
7, 1, 234, 276, 0, 26  
7, 1, 276, 305, 0, 19  
7, 1, 305, 334, 0, 10  
7, 1, 334, 361, 0, 26  
7, 1, 361, 388, 0, 16  
7, 1, 388, 388.5, 0, 15  
8, 1, 0, 121, 1, 39  
9, 1, 0, 55, 0, 24  
9, 1, 55, 90, 0, 23  
9, 1, 90, 123, 0, 20  
9, 1, 123, 157, 0, 20  
9, 1, 157, 192, 0, 26  
9, 1, 192, 245, 0, 8  
9, 1, 245, 272, 0, 21  
9, 1, 272, 301, 0, 19  
9, 1, 301, 335, 0, 18  
9, 1, 335, 370, 0, 8  
9, 1, 370, 370.5, 0, 14  
10, 1, 0, 7, 1, 29  
11, 1, 0, 73, 0, 14  
11, 1, 73, 105, 0, 16  
11, 1, 105, 154, 0, 4  
11, 1, 154, 182, 1, 11  
12, 1, 0, 138, 0, 15  
12, 1, 138, 259, 0, 16  
12, 1, 259, 287, 0, 17  
12, 1, 287, 347, 1, 19  
13, 0, 0, 45, 0, 15
```

Suppl emental \_real \_data. txt

13, 0, 45, 101, 0, NA  
13, 0, 101, 129, 0, 14  
13, 0, 129, 168, 0, 17  
13, 0, 168, 209, 0, 7  
13, 0, 209, 259, 0, 9  
13, 0, 259, 292, 0, 16  
13, 0, 292, 327, 0, 23  
13, 0, 327, 362, 0, 22  
13, 0, 362, 404, 0, 21  
13, 0, 404, 404. 5, 0, 11  
14, 1, 0, 600, 0, 22  
14, 1, 600, 600. 5, 0, 8  
15, 0, 31, 108, 1, NA  
16, 1, 8, 50, 0, 7  
16, 1, 50, 112, 0, 6  
16, 1, 112, 173, 0, 6  
16, 1, 173, 209, 1, 4  
17, 1, 0, 18, 1, 21  
18, 0, 0, 77, 0, 16  
18, 0, 77, 129, 0, 32  
18, 0, 129, 159, 0, 13  
18, 0, 159, 199, 0, 10  
18, 0, 199, 227, 0, 14  
18, 0, 227, 262, 0, 9  
18, 0, 262, 290, 0, 6  
18, 0, 290, 332, 0, 10  
18, 0, 332, 377, 0, 20  
18, 0, 377, 426, 0, 6  
18, 0, 426, 426. 5, 0, 13  
19, 1, 0, 53, 0, 17  
19, 1, 53, 96, 0, 17  
19, 1, 96, 158, 0, 14  
19, 1, 158, 186, 0, 39  
19, 1, 186, 214, 0, 32  
19, 1, 214, 242, 0, 25  
19, 1, 242, 272, 0, 23  
19, 1, 272, 307, 0, 17  
19, 1, 307, 350, 1, 28  
20, 1, 28, 63, 0, 15  
20, 1, 63, 92, 0, 25  
20, 1, 92, 158, 0, 17  
20, 1, 158, 189, 0, 15  
20, 1, 189, 220, 0, 16  
20, 1, 220, 248, 0, 19  
20, 1, 248, 280, 0, 17  
20, 1, 280, 308, 0, 16  
20, 1, 308, 336, 0, 11  
20, 1, 336, 367, 0, 16  
20, 1, 367, 401, 0, 15  
20, 1, 401, 401. 5, 0, 10  
21, 0, 0, 68, 0, 27  
21, 0, 68, 456, 1, 4  
22, 1, 0, 42, 0, 18  
22, 1, 42, 122, 0, 7  
22, 1, 122, 520, 0, 10  
22, 1, 520, 520. 5, 0, 21  
23, 1, 0, 41, 0, 15  
23, 1, 41, 77, 0, 6  
23, 1, 77, 120, 0, 23  
23, 1, 120, 147, 0, 18  
23, 1, 147, 203, 0, 19  
23, 1, 203, 238, 0, 9  
23, 1, 238, 348, 0, 11  
23, 1, 348, 390, 0, 12  
23, 1, 390, 419, 0, 8  
23, 1, 419, 613, 0, 8  
24, 1, 0, 39, 1, 21  
25, 1, 0, 35, 0, 7

Supplemental\_real\_data.txt

25, 1, 35, 66, 0, 6  
25, 1, 66, 95, 1, 3  
26, 1, 0, 39, 0, 24  
26, 1, 39, 123, 0, 11  
26, 1, 123, 193, 0, 6  
26, 1, 193, 271, 0, 4  
26, 1, 271, 313, 0, 0  
26, 1, 313, 348, 0, 4  
26, 1, 348, 481, 0, 1  
26, 1, 481, 481.5, 0, 1  
27, 0, 0, 37, 0, 16  
27, 0, 37, 65, 0, 9  
27, 0, 65, 94, 0, 8  
27, 0, 94, 138, 0, 14  
27, 0, 138, 181, 0, 17  
27, 0, 181, 213, 0, 13  
27, 0, 213, 253, 0, 16  
27, 0, 253, 280, 0, 26  
27, 0, 280, 325, 0, 21  
27, 0, 325, 354, 0, 22  
27, 0, 354, 382, 0, 16  
27, 0, 382, 487, 0, 12  
27, 0, 487, 487.5, 0, 19  
28, 1, 0, 15, 1, 24  
29, 0, 0, 38, 0, 5  
29, 0, 38, 95, 0, 6  
29, 0, 95, 130, 0, 5  
29, 0, 130, 165, 0, 2  
29, 0, 165, 200, 0, 5  
29, 0, 200, 229, 0, 8  
29, 0, 229, 257, 0, 3  
29, 0, 257, 300, 0, 3  
29, 0, 300, 334, 0, 5  
29, 0, 334, 367, 0, 2  
29, 0, 367, 396, 0, 0  
29, 0, 396, 396.5, 0, 2  
30, 1, 0, 28, 0, 17  
30, 1, 28, 57, 0, 21  
30, 1, 57, 93, 0, 24  
30, 1, 93, 119, 0, 11  
30, 1, 119, 165, 0, 22  
30, 1, 165, 203, 0, 1  
30, 1, 203, 231, 0, 15  
30, 1, 231, 259, 0, 16  
30, 1, 259, 308, 0, 9  
30, 1, 308, 339, 0, 12  
30, 1, 339, 339.5, 0, 18  
31, 0, 0, 27, 0, NA  
31, 0, 27, 55, 0, 11  
31, 0, 55, 104, 0, 16  
31, 0, 104, 176, 0, 10  
31, 0, 176, 209, 0, 17  
31, 0, 209, 244, 0, 12  
31, 0, 244, 272, 0, 15  
31, 0, 272, 310, 0, 14  
31, 0, 310, 359, 0, 11  
31, 0, 359, 406, 0, 7  
31, 0, 406, 581, 0, 12  
32, 1, 0, 28, 0, 24  
32, 1, 28, 52, 0, 21  
32, 1, 52, 108, 0, 16  
32, 1, 108, 150, 0, 19  
32, 1, 150, 192, 0, 9  
32, 1, 192, 224, 0, 13  
32, 1, 224, 259, 0, 15  
32, 1, 259, 294, 0, 17  
32, 1, 294, 329, 0, 26  
32, 1, 329, 357, 0, 21

Supplemental\_real\_data.txt

32, 1, 357, 392, 0, 16  
32, 1, 392, 608, 0, 14  
33, 0, 0, 35, 0, 13  
33, 0, 35, 64, 0, 5  
33, 0, 64, 91, 0, 9  
33, 0, 91, 119, 0, 13  
33, 0, 119, 147, 0, 7  
33, 0, 147, 231, 0, 13  
33, 0, 231, 260, 0, 17  
33, 0, 260, 294, 0, 15  
33, 0, 294, 336, 0, 5  
33, 0, 336, 412, 0, 4  
33, 0, 412, 413, 0, 6  
34, 0, 0, 463, 0, 27  
34, 0, 463, 463.5, 0, 15  
35, 0, 0, 49, 0, 2  
35, 0, 49, 84, 0, 0  
35, 0, 84, 119, 0, 2  
35, 0, 119, 147, 0, 4  
35, 0, 147, 182, 0, 1  
35, 0, 182, 225, 0, 1  
35, 0, 225, 274, 0, 6  
35, 0, 274, 351, 0, 6  
35, 0, 351, 392, 0, 2  
35, 0, 392, 392.5, 0, 0  
36, 0, 0, 28, 0, 22  
36, 0, 28, 67, 0, 10  
36, 0, 67, 315, 0, 15  
36, 0, 315, 386, 0, 9  
36, 0, 386, 423, 0, 25  
36, 0, 423, 456, 0, 9  
36, 0, 456, 742, 1, 6  
37, 1, 0, 116, 0, 11  
37, 1, 116, 217, 0, 9  
37, 1, 217, 251, 0, 1  
37, 1, 251, 294, 0, 4  
37, 1, 294, 329, 0, 6  
37, 1, 329, 369, 0, 7  
37, 1, 369, 369.5, 0, 7  
38, 1, 0, 307, 0, 14  
38, 1, 307, 378, 0, 11  
38, 1, 378, 398, 0, 6  
39, 0, 0, 32, 0, 19  
39, 0, 32, 57, 0, 10  
39, 0, 57, 94, 0, 6  
39, 0, 94, 123, 0, 12  
39, 0, 123, 164, 0, 20  
39, 0, 164, 185, 0, 20  
39, 0, 185, 234, 0, 11  
39, 0, 234, 282, 0, 7  
39, 0, 282, 336, 0, 12  
39, 0, 336, 372, 0, 8  
39, 0, 372, 372.5, 0, 6  
40, 1, 0, 40, 0, 19  
40, 1, 40, 56, 1, 23  
41, 0, 0, 28, 0, 20  
41, 0, 28, 70, 0, 12  
41, 0, 70, 110, 0, 12  
41, 0, 110, 172, 0, 3  
41, 0, 172, 214, 0, 3  
41, 0, 214, 252, 0, 0  
41, 0, 252, 411, 0, 0  
41, 0, 411, 411.5, 0, 4  
42, 0, 0, 35, 0, 9  
42, 0, 35, 71, 0, 9  
42, 0, 71, 99, 0, 4  
42, 0, 99, 133, 0, 6  
42, 0, 133, 168, 0, 6

Supplemental\_real\_data.txt

42, 0, 168, 217, 0, 8  
42, 0, 217, 269, 1, 25  
43, 1, 0, 30, 1, 39  
44, 1, 0, 30, 0, 7  
44, 1, 30, 59, 0, 6  
44, 1, 59, 85, 0, 4  
44, 1, 85, 119, 0, 8  
44, 1, 119, 147, 0, 7  
44, 1, 147, 176, 0, 0  
44, 1, 176, 217, 0, 11  
44, 1, 217, 253, 0, 8  
44, 1, 253, 296, 0, 9  
44, 1, 296, 329, 0, 3  
44, 1, 329, 359, 0, 1  
44, 1, 359, 420, 0, 1  
44, 1, 420, 420.5, 0, 1  
45, 0, 0, 28, 0, 16  
45, 0, 28, 62, 0, 14  
45, 0, 62, 95, 0, 13  
45, 0, 95, 118, 1, 19  
46, 0, 0, 66, 0, 14  
46, 0, 66, 90, 0, 8  
46, 0, 90, 114, 0, 2  
46, 0, 114, 146, 0, 9  
46, 0, 146, 182, 0, 3  
46, 0, 182, 204, 0, 6  
46, 0, 204, 240, 0, 4  
46, 0, 240, 267, 0, 3  
46, 0, 267, 316, 0, 1  
46, 0, 316, 359, 0, 4  
46, 0, 359, 399, 0, 12  
46, 0, 399, 497, 0, 4  
47, 0, 0, 29, 0, 19  
47, 0, 29, 64, 1, 10  
48, 1, 0, 23, 0, 10  
48, 1, 23, 56, 0, 7  
48, 1, 56, 87, 0, 8  
48, 1, 87, 128, 0, 5  
48, 1, 128, 165, 0, 15  
48, 1, 165, 199, 0, 17  
48, 1, 199, 235, 0, 13  
48, 1, 235, 298, 0, 3  
48, 1, 298, 333, 0, 10  
48, 1, 333, 378, 0, 22  
48, 1, 378, 424, 0, 22  
48, 1, 424, 424.5, 0, 7  
49, 1, 0, 29, 1, 25
